# Supplementary material
Source: Research Square preprint supplement (doi:10.21203/rs.3.rs-9220595/v1)
Supplement: Supplementary file 1 [file eef0e081fe05c8cefcba9163.xlsx]

## Sheet: Sheet1
Author	Year	Title	Article DOI	Country	Region	Study Design	Study Setting	Study Participants' Age	No. in Intervention Group		Total Population	Study Participants Education Level	S.E Intervention Target Group	S.E Intervention Applied	S.E Intervention Duration	Brief Description of the SEL Intervention	Measure of Intervention Effectiveness	Measurement Tools Used	Academic Achievement/Benefits Assessed	Social Emotional Development	Physical Health	Identity Development	Cognitive Development	Mental Health	Other Domains Assessed	Important Findings
Momoko Hayakawa	2013	The Longitudinal Process of Early Parent Involvement on Student Achievement: A Path Analysis	NHSA Dialog. 2013 ; 16(1): 103–126.	USA	North America	Longitudinal Study	School	0	989 attended the CPC program for at least 1 year (of those, 534 children attended CPCs for two years)	550	1539	Kindergarten- 6th Grade	Parents, Students	Child-Parent Center (CPC) program	1-2 Yrs	The CPC program is a Title 1 funded pre-kindergarten program located in the poorest neighborhoods of Chicago seeking to improve parent involvement in children's development.Direct parent involvement in the program is expected to enhance parent-child interactions, parent and child attachment to school, social support among parents, and consequently promote children's school readiness and social ad…	Student academic motivation, parental involvement, Student academic performance	Child-Parent Centers participation at preschool through school records and parent surveys, The Iowa Test of Basic Skills (to test for academic achievement)	Pre-reading skills, reading comprehension	Self-regulation: The intervention's effect on self regulation was negative.					Benefits of parental involvement in the academic life of their children both in the school and at home. Parental involvement was found to have a positive effect.	The CPC program sets the stage for subsequent parent involvement, student motivation, and academic achievement throughout early and middle childhood. Early parent involvement predicted early achievement, which contributed to enhancing early student motivation, and in turn had an impact on subsequent parent involvement and student achievement.Early student achievement played a critical role within…
María-José Cantero	2020	Effectiveness of an Emotional Intelligence Intervention and Its Impact on Academic Performance in Spanish Pre-Adolescent Elementary Students: Results from the EDI Program	10.3390/ijerph17207621	Spain	Europe	Quasi-experimental Study	School	10-11 yrs	136	46	182	5th Grade	Students	EDI Program	2 yrs	2 year School-based emotional intelligence program to help build childrens's emotional intelligence. participants in the intervention group received the sessions of the EDI program over the course of two academic years during homeroom time. In each academic year, the intervention took place for sixteen weeks, with a one-week interval between sessions. During the same class period, participants in…	performance in an Emotional intelligence test and General academic performance tests	Emotional intelligence was assessed with the Spanish version of the Emotional Quotient Inventory (EQ-i: YV), General academic performance (AP), mathematics performance (MP), and language performance (LP) using the average grade in all subjects (from 0 to 10). The MP and LP were evaluated with the grade obtained in the mathematics and Spanish language subjects	General academic performance and mathematics and language performance	Emotional Intelligence-Intrapersonal skills, whose objective was for students to know and understand their own emotions and those of others; (2) interpersonal skills, which sought to develop greater competence in their social relations by working on assertiveness and empathy; (3) emotion regulation, whose objective was for children to learn to manage emotions and develop tolerance to frustration …						The results confirm the significant improvement in EI as a result of the intervention, demonstrating the e ectiveness of the EDI program. The differences between the intervention group and the non-intervention group were greater after the second year. This result indicates that the first year of intervention improves EI significantly, but a long-term intervention would be better yo maintain these…
Margarita Panayiotou	2019	An empirical basis for linking social and emotional learning to academic performance	10.1016/j.cedpsych.2019.01.009	United Kingdom	Europe	Cluster randomized trial	School	9–11 yrs	846	780	1626	Elementary School	Students	Promoting Alternative Thinking Strategies (PATHS) curriculum	N/A	Improving student's social-emotional competence and imptovin their academic performance through three paths; direct effects, school connectedness, or lessening mental health difficulties	Social Skills Improvement (self-awareness, self management), School connectedness, performance in Key Stage 2 (KS2) national curriculum test scores in mathematics, reading, and writing,		Mathematics, reading, and writing,							Social-emotional competence, school connectedness, and mental health difficulties all contribute positively to academic attainment
Yujin Jang	2021	Longitudinal Effects of Parental Academic Support on Academic Achievement in Korea: Will You Be a Companion or a Manager in Your Children’s Academic Support?	10.3390/ ijerph182010823	South Korea	Asia	Longitudinal Study	School	11 yrs	7324	0	7324	Preschool	Students	Parental support	3 yrs	Parents' involement in childrens' school work in terms of advising, managing academic activities such as private tutoring, managing grades etc	Adolescents' psychological attributes, School achievement, parental academic support		Test scores ( Korean, Math and English subjects)	Psychological attributes: PAS as a manger had positive effect on students' amotivation while PAS as a companiona had a negative effect on ammotivation				Psychological attributes: PAS as a manger had positive effect on students' amotivation while PAS as a companiona had a negative effect on ammotivation		Parents academic involvement (as companions) was related to improved academic test scores and motivation whereas their involvement ( as mangaers) had a negative impact on children's academic performance nad motivation. Parents' attention to achievement increased children's self-efficacy.
Alexandra S. Youmans	2017	How effectively does the full-day, play-based kindergarten programme in Ontario promote self-regulation, literacy, and numeracy?	10.1080/03004430.2017.1287177	USA	North America	Exploratory Study	School	4-5 yrs	6453	25574	32027	Kindergarten School Children	Students	Full-Day Early Learning Kindergarten (FDELK) programme,	1 yr	Play-based kindergaten progrmme aimed at equiping children from low SES schools with self-regulation, lietracy and numeracy skills.	Self-regulation, literacy, numeracy skills	The Early Development Instrument (EDI)	Literacy and numeracy skills	Self-regulation: The intervention's effect on self regulation was negative.			Numeracy and literacy skills:The intervention results did not support the hypothesis, as the effect on numracy was negative and that on literacy non-significant			The hypothesised gains of the intervention ( self-regulation, literacy, numeracy) were not supported by the results. Students fro lower SES schools posted lower scires in literacy and numeracy, while the reverse was true for students in hgher SES. The results from this intervention were in contrast with thoise of a similar intervention (probably due to different measures of achievement, program d…
Xinyin Chen	2008	Effects of the Peer Group on the Development of Social Functioning and Academic Achievement: A Longitudinal Study in Chinese Children	10.1111/j.1467-8624.2007.01123	China	Asia	Longitudinal Study	School	9-12 yrs	535	0	535	Elementary and junior high schools	Students	Peer group support and positive interactions	2 yrs	The role social interactions among peers/ peer relationships	Academic achievement, peer assesment of social behaviours, leadership	Peer assessments of social behaviors: The Revised Class Play tool was administered, Teacher rating: the Teacher – Child Rating Scale (T – CRS for school-related social competencies, acting out and learning problems sociometric nominations to measure school network and connectedness, Peer social groups and was adopted to identify children’s natural social groups.	Test scores (mathematics, Chinese and English)	Group academic performance positively predicted later social competence and negatively predicted later social problems						Peer groups had a positive impact on student's academic outcomes and social behaviour. Groups that were strong academically exhibited stronger social behaviours, the reverse is also true. There was no significant gender differences found in the study.
Nayab Ali	2020	School role in improving parenting skills and academic performance of secondary schools students in Pakistan	10.1016/j.heliyon.2020.e05443	Pakistan	Asia	Cross-sectional Study	School	13-18 yrs	448	0	448	9th and 10th Grade Students	Students, Parents	Improvement of parents participation in the learning process of students	N/A	The intervention was applied across 36 schools in Pakistan and involved 448 students.The schools took the responsibility to train the parents and monitor them. Parents were given training on how to support their children in their education both at home and at school. They were equipped with skills such as helping students to set their eductaional goals, motivate them, reading loud with children	Improvements in children's academic performance through exams	Teacher reported performance in examinations	Performance in various subjects in the Pakistan school curriculum						Improvement in parenting skills as an impact of the intervention on the parents. The school (teachers) had an important role in influencing the participation and support of parents in the education of their children (71.4% of A-1 Grade students appreciated the role of the school in influencing the parenting habits and support of their gurdians).	Intervention geared towards inmproving the role, support, and participation of parents in the education of their children are important and contribute to better academic performances from the children. These interventions include facilitating parents to listen to their children and helping students in setting their goals.
Ghaleb H. Alnahdi	2022	Teachers’ Implementation of Inclusive Teaching Practices as a Potential Predictor for Students’ Perception of Academic, Social and Emotional Inclusion.	10.3389/fpsyg.2022.917676	Saudi Arabia	Asia	Cluster randomized trial	School	8-15 years	742	82	824	3rd-8th Grade	Students	Implementation of inclusive teaching practices (differentiation and personalization) on students’ perceptions of inclusion.	N/A	Implemented Inclusive Teaching Practices (differentiation and personalization) to improve student's academic connectedness and performance	Improvements in students’ perception of inclusion regarding their social inclusion, academic self-concept and school wellbeing	Arabic version of the Perceptions of Inclusion Questionnaire (PIQ-S-AR) and the Inclusive Teaching Practices Scale (ITPS).	Academic self-concept and connectedness in school	Self-regulation: PAS as a manager had positive impact on both self regulation and academic performance while PAS as a mabnager did not have an effect on both self-regulation and academic performance.				Psychological attributes: PAS as a manger had positive effect on students' amotivation while PAS as a companiona had a negative effect on ammotivation		High levels of inclusive teaching practices strongly predicted students’ perceived emotional inclusion, social inclusion, and academic self-concept. Inclusive teaching practices were found to increase student's academic performance, school wellbeing and social inclusion.
Joseph P. Allen	2011	An Interaction-Based Approach to Enhancing Secondary School Instruction and Student Achievement	10.1126/science.1207998.	USA	North America	Randomized Control Study	School	11-18 yrs	1267	970	78 secondary school teachers and 2,237 students	Secondary School	Students, Teachers	My Teaching Partner–Secondary program (MTP-S)	2 yrs	The MTP-S intervention focused on improving teacher-student interactions in secondary classrooms with student so as to enhance student motivation and achievement. It integrates initial workshop-based training, an annotated video library, and a year of personalized coaching followed by a brief booster workshop. During the school year, teachers send in video recordings of class sessions in which th…	Improvement in academic performance and better quality of interactions and relationships between students and their teachers	Teacher adminsitrated exams testing various subjects such as maths and science	Performance in exams. Improved teacher-student interactions predicted improved student achievement regardless of the content area of instruction suggests the potential value of a focus on teacher-student interactions, apart from the specific content of knowledge being transmitted by teachers.	Teacher-student interaction qualities. There was a significant indirect effect of the intervention on student achievement in the post-intervention year through changes in teacher-student interaction qualities, consistent with a mediating role for these qualities						There was nonsignificant effect of intervention on end-of-year test scores in the intervention year but a significant positive effect in the post-intervention year. Students in the MTP-S intervention had a significant net gain relative to the control group of 0.22 SD.
Anne C. Fletcher	2010	Maternal Management of Social Relationships as a Correlate of Children’s School-Based Experiences	2379-397X (Electronic); 1059-308X (Print)	USA	North America	Cross-sectional Study	School, Home	8 and 11 years of age (Mean = 9.26)	311	0	311	Elementary School Children	Students, Parents	Closure relationships and friednship facilitation (where explicitly and intentionally facilitate and support their children’s development of peer relationships)	N/A	Compared the role of mothers in using two interventions arents maintain relationships with their children’s friends’ parents, closed systems (closure relationships) and explicitly and intentionally facilitating and supporting their children’s development of peer relationships.	Measured using end-of-year grades in math and language arts (scored on a conventional 4-point scale) and End-of-Grade (EOG) achievement test scores in math and reading.	Children’s school-based friendships were identified using the Social Contexts of Friends Interview filled by both mothers, School-Based Social Network Closure and students, The Friendship Facilitation Strategies Questionnaire was used to assess the maternal friendship facilitation	End-of-Grade (EOG) achievement test scores in math and reading.					Sources of school-based stress among children. Measures of stress were intercorrelated positively such that higher levels of stress in one domain (e.g., academics) were associated with higher levels of stress in any other domain (e.g., self, peers, teacher). Associations between academic achievement and stress variables indicated that children who experienced higher levels of stress in each domai…		Associations among measures of friendship facilitation, academic achievement, and stress revealed inconsistent patterns. Enabling proximity to peers was associated with higher reading grades, EOG reading scores, and EOG math scores, whereas talking with offspring was associated with lower reading grades, EOG reading scores, and EOG math scores. Encouraging children’s involvement in activities was…
Arya Ansari	2015	Learning-related Social Skills as a Mediatorbetween Teacher Instruction and Child Achievement in Head Start	10.1111/sode.12124	USA	North America	Cross-sectional Study	School	3-5 yrs	0	0	936	Pre-K and Kindergarten School Children	Students	Head Start Program	33 Months	Head Start Program is implemented for children between the ages of 0-5 and involves provision of extensive education with the primary goal of promoting academic skills. Additionally, the program also targets the provision of learning-related social skills from an early age to facilitate later learning.	Direct child assessments, parent and teacher-self reports, and classroom observations.	Academic performance was assessed using the Literacy and Math Instruction, Peabody Picture Vocabulary Test (PPVT), theWoodcock Johnson III (WJ-III), The Story and Print Concepts task, nationally normed assessments that were developed for the Early Childhood Longitudinal Study Birth Cohort(ECLS-B). Children’s Learning-related Social Skills were assessed using teacher-provided reports, the Preschoo…	Performance in mathematics and literacy	Children’s Learning-related Social Skills-learning-related social skills at entry to Head Start (Fall of Age 3) did not predict gains in academic achievement from Fall to Spring of that year. Children’s learning-related social skills at the end of the first Head Start year, however, did predict gains in academic achievement through the end of the second Head Start year (β = .11, p < .001).					Examined whether teachers’ instructional time only promoted children’s academic achievement in higher quality classrooms by testing whether classroom quality moderated the link between instructional time and children’s development. Head start intervention improved academic outcomes across all levels	Found evidence that children’s academic achievement led to increases in their learning-related social skills over time. Children’s academic achievement predicted improvements in their learning-related social skills between the end of the first Head Start year and the end of the second Head Start year, as well as between the end of the second Head Start year and end of kindergarten.There were no s…
Arya Ansari	2017	Immigration and the Interplay of Parenting, Preschool Enrollment, and Young Children's Academic Skills	10.1037/fam0000087.	USA	North America	Longitudinal Study	School and Home	2-5 yrs	0	0	6250	Kindergarten School Children	Students, Parents	Parental support of early learning	5 yrs	The intervention is a conceptual model that links parents’ engagement in early academically focused parenting and their enrollment of children in preschool while also highlighting children's development of the academic skills that have been established as important precursors for achievement in the K-12 system. It also captures the bidirectional interplay of parenting behavior and children's pres…	Improved enrolment of children in preschool, improved academic performance, and improved participation of parents in the children's education	Parental support of early learning- Investment in education through investment, parents (at age 2) reported the number of soft toys, push toys, books, and CDs at home using Home Observation for Measurement of the Environment scale (HOME) and whether they had taken their children to a zoo, museum, or story hour and whether they had visited a library to borrow books or DVDs in the past month. Child…	Children's reading/literacy skills- letter recognition, early reading, phonological awareness, and knowledge of print. Mathematical skills- number sense, properties, measurement, and patterns. Children's enrollment rates in formal preschools (center-based care and Head Start classrooms).							Parental support for early learning was associated with gains in children's academic skills, which, in turn, were associated with their likelihood of preschool attendance. Preschool experience then was associated with further gains in children's early academic competencies, which were then associated with increased parental support.Children's academic skills were associated with their preschool a…
Arya Ansari	2018	Multi-grade Kindergarten Classrooms and Children's Academic Achievement, Executive Function, and Socio-Emotional Development	doi:10.1002/icd.2036.	USA	North America	Longitudinal Study	School	5 yrs	200	10800	11000	Kindergarten School Children	Students	Multi-grade classrooms (combined pre-kindergarten and kindergarten classrooms serving 3-, 4-, and 5-year-olds)	1 yr	Combination of pre-kindergarten and kindergarten classrooms for 5 yr olds kindergatens	Improvement in academic performance (reading and maths)	Academic achievement measured using the Item Response Theory (IRT) for reading assessment (print familiarity, letter recognition, decoding, and vocabulary knowledge) and math assessment (problem solving, geometry and spatial sense, and measurement skills). Executive function- (a) cognitive flexibility, which was assessed using the Dimensional Change Card Sort and (b) working memory, which was ass…	Reading and Mathematical skills	Assessed the children's attentional control, internalizing and externalizing behavior problems, and social skills. No significant differences were documented for children's internalizing problems or social skills.			Executive Functions (cognitive flexibility and working memory); Children in multi-grade classrooms demonstrated fewer gains in cognitive flexibility (18% of a standard deviation) throughout the kindergarten year.			Children who attended multi-grade classrooms that combined pre-K and kindergarten demonstrated fewer gains in math and literacy skills (less academic achievement, executive function, and externalizing behavior) throughout the school year (equivalent of roughly 4 to 6.5 months of academic development).
Laura S. Bakosh	2015	Maximizing Mindful Learning: Mindful Awareness Intervention Improves Elementary School Students’ Quarterly Grades	10.1007/s12671-015-0387-6	USA	North America	Quasi-experimental design	School	Not reported	93	98	191	Elementary School Children	Students,Teachers	Mindful-based social emotional learning (MBSEL) program.	8 weeks, 10-min-per-day	All intervention teachers participated in a 60-min training session the day before the program launch. The intervention utilized a series of guided mindful-based awareness and attention focusing practices as the method for students to engage with social and emotional learning (SEL) concepts, mindful-based social emotional learning(MBSEL) program.The 8-week study was conducted using a pre-recorded…	Student's performance in the student quarterly grades and classroom behavior, Facilitate teachers to accomplish their planned curriculum.	Teachers reported student grades and teacher completed-log each day documenting how many behavior events occurred. Behavior events were defined as principal visits, calls home,suspensions, and red cards-which were given for consistent classroom disruptions.	Teachers reported student grades in each of six subject areas, including reading, science, math, writing, spelling,and social studies.	The program reduced classroom disturbance and students in the intervention group were more focused, calm, and less distracted. Teachers were also less stressed thus improving the learning experiences					Facilitation of teachers to complete their curriculum- Teachers greatly supported the program and complemented its consistency and ease of implementation.	Student’s quarterly grades before the intervention were highly correlated with their quarterly grades afterward.The daily mindful awareness trainings significantly predict a difference in elementary students’ term grades in science and reading, as well as notable improvements in classroom behavior. For math,writing, spelling, and social studies, group assignment (being in intervention or control)…
Chloe Bedard	2018	Evaluation of a Direct-Instruction Intervention to Improve Movement and Preliteracy Skills among Young Children: A Within-Subject Repeated-Measures Design	10.3389/fped.2017.00298	Canada	North America	Quasi-experimental design	Community	3–4 yrs	0	0	11	None	Students	Direct-instruction Movement and Preliteracy program	10 Weeks, 1 hr weekly	Each 60-min session consisted of three components: direct movement skill instruction (30 min), unstructured exploratory free play (15 min), and an interactive storybook reading activity (15 min). Key teaching strategies employed throughout all aspects of the program included: an emphasis on the use of correctterminology; individual scaling of skill level; significant and active parent involvement…	Children's print-concept knowledge, alphabet knowledge, and gross motor skills after the implementation of the intervention	Gross motor subtests of the Peabody Developmental Motor Scales-2 (PDMS-2), Preschool Word and Print Awareness (PWPA) test and the Phonological Awareness Literacy Screening: Preschool (PALS-PK) to measure print-concept knowledge and alphabet knowledge, parent-reported questionnaire assessed attendance and home practice	Children's print-concept knowledge and alphabet knowledge after the implementation of the intervention		Assessed the effectiveness of the movement and preliteracy skills on gross motor skills improvement in children, which was found to increase after the intervention					Participation in the movement and preliteracy program led to positive improvements in gross motor skills, print-concept knowledge, and alphabet knowledge in 3- to 4-year-old children over time and these gains were sustained over a 5-week followup period.
Karen L. Bierman	2008	Promoting Academic and Social-Emotional School Readiness: The Head Start REDI Program	10.1111/j.1467-8624.2008.01227.x.	USA	North America	Randomized Control Study	School	4 yrs	Not Reported	Not Reported	356	Pre-Kindergarten School Children	Students	(Head Start REDI- Research-based, Developmentally Informed) or “usual practice” conditions.	1 yr	The intervention was delivered by classroom teachers and involved brief lessons, “hands on” extension activities, and specific teaching strategies linked empirically with the promotion of: 1) social-emotional competencies, and 2) language development and emergent literacy skills. Take-home materials were provided to parents to enhance skill development at home.	Language development (vocabulary, syntax), emergent literacy (phonological awareness, print knowledge), and social-emotional skills (emotional understanding, social problem-solving)	Academics: Test of Preschool Early Literacy (TOPEL), Expressive One-Word Picture Vocabulary Test (EOWPVT), Grammatical Understanding subtest of the Test of Language Development (TOLD).Emotional understanding and socio-cognitive skills: The Sentence Imitation Assessment of Children’s Emotion Skills (ACES), socio-emotional behaviors-Social Competence Scale,	Language/emergent literacy skill enrichment—Four language and emergent literacy skills were targeted in REDI: 1) vocabulary, 2) syntax, 3) phonological awareness, and 4) print awareness.	Social-emotional skill enrichment			Emotional understanding and social-cognitive skills		Head Start-REDI sought to support teachers, and improve the fidelity of research-based instructional practice in Head Start classrooms, by providing teachers with a well-specified enrichment curriculum, along with a year of mentored professional development in theimplementation of that curriculum and corresponding teaching practices. The curriculum included specific instructional strategies and h…	Results revealed significant differences favoring children in the enriched intervention classrooms on measures of vocabulary, emergent literacy, emotional understanding, social problem-solving, social behavior, and learning engagement. Children who received the REDI enrichment showed behavioral improvements in these areas that averaged about one-fifth of a standard deviation more than the behavio…
Karen L. Bierman	2021	Sustained Benefits of a Preschool Home Visiting Program: Child Outcomes in Fifth Grade	10.1016/j.ecresq.2021.03.017.	USA	North America	Randomized Control Study	Home and School	4 yrs	95	105	200 dyads of syudents and their primary caregivers	Elementary School (Fifth Grade)	Students	Preschool Home Visiting Program	1 yr	16-session home-visiting intervention-10 scheduled during the spring semester of the prekindergarten year and six scheduled in the fall after the child’s transition into kindergarten. The intervention was manualized, and included a protocol of reflection questions, discussion topics, and skill reviews for each session. Central to the intervention were REDI activity boxes of play materials and sto…	Improved eading skills, more academic motivation, and learning engagement, improved parenting academic expectations and reduced parenting stress	Academic Performance- Academic Competence Evaluation Scales,	Reading skills, academic motivation, and learning engagement	Social-emtional domain-Social Competence Scale and the Student-Teacher Relationship Scale. The intervention had moderated effects on the chidlren's social competencies and the student-teacher relationships						Children in the intervention group continued to perform at a higher level in reading, language arts, and learning engagement than children in the control group.academic performance (reading skills, academic motivation, and learning engagement). The benefits were on both Children from families with lower levels of risk were most likely to experience sustained benefits from the intervention.
Christian S. Chan	2012	Pathways of influence in school-based mentoring: The mediating role of parent and teacher relationships	10.1016/j.jsp.2012.10.001	USA	North America	Randomized Control Study	School	9-17 yrs	526	0	526	Elementary School (4th-9th Grade)	Students	Big Brothers Big Sisters school-based mentoring programs	1 yr	The youths were paired with a mentor for a period of one academic year. The frequency of the meetings between the youth and their mentors varied between dyads with some meeting weekly while others met monthly.	The effects of these mentorship were then evaluated in terms of improvement in social relationships, Prosocial behavior, self-esteem, academic attitudes, and academic behavior.	Quality of mentor relationship was measured with two youth-reported scales Youth-Centered Relationship and Youth's Emotional Engagement, Quality of teacher–student relationship was measured using two youth-reported scales, an adapted version of the Teacher Relationship Quality scale, and the Teacher Connectedness subscale from the Hemingway Measure of Adolescent Connectedness, Quality of parent r…	Academic Attitudes (AA) and Academic Performance (Grade)	Higher quality mentoring relationships significantly affected parent–child and teacher-child relationships positively					Student's prosocial behavior	Higher quality mentoring relationships were associated with improvements in students' relationships with their parents and teachers and that these improvements, in turn, were associated with school-relatedpsychological and behavioral outcomes (e.g., improved academic attitudes and self-esteem, increased prosocial behavior).
Carolina Cordeiro	2021	Promoting Third Graders’ ExecutiveFunctions and Literacy: A Pilot Study Examining the Benefits of Mindfulness vs. Relaxation Training.	10.3389/fpsyg.2021.643794	Portugal	Europe	Randomized Control Study	School	7-9 yrs	29	37	66	Elementary School Children (3rd Grade)	Students	Mindfulness training intervention and relaxation training intervention	8 weeks (16 ; 30-min sessions, delivered twice a week)	Both interventions were implemented in groups of 7–8 students during 16 30-min sessions, delivered twice a week by two trained psychologistsThe mindfulness intervention program was organized into three components: calming the mind (viz., listen to a resonance instrument and focus attention on breath); consciously attending to internal and external stimuli (viz., observe sensations, emotions, and …	Performance in tests (writing tasks: opinion essay writing, alphabet task, spelling through dictation).	Non-verbal Intelligence was measured using Raven’s colored progressive matrices. Cognitive Tasks (Attention-Cancelation task from the Coimbra Neuropsychological Assessment Battery;Working memory-Digit span task from the Wechsler Intelligence and Scale for Children-III; inhibitory control-Inhibition subtest of the NEPSY-II; cognitive flexibility-A Development Neuropsychological Assessment and the …	Opinion essay writing, alphabet task, spelling through dictation				There were condition effects on performance-based and teacher-rated cognitive flexibility and on a performance-based composite score of EFs, which were moderated by participants characteristics. Overall, mindfulness training worked better for those with higher EFs at pretest, whereas the relaxation training benefited more those with lower EFs at pretest.			The study did not find group differences on measures of attention, inhibitory control, and working memory.Concerning writing tasks, though there were no mindfulness effects on spelling and text quality, children receiving mindfulness training showed greater handwriting fluency than their peers.
Philippine Courtier	2021	Effects of Montessori Education on the Academic, Cognitive, and Social Development of Disadvantaged Preschoolers: A Randomized Controlled Study in the French Public-School System	10.1111/cdev.1357	France	Europe	Randomized Control Study	School	5-6 yrs	98	78	176	Kindergarten	Curriculum	The Montessori Preschool Curriculum	4 yrs	Children from one preschool were randomly assigned (by the school) to either Montessori or conventional classrooms. Over 4 years, children were tested on a range of tasks assessing language, mathematical, executive, and social abilities. The measures were used to compare the skills of children from Montessori classrooms to those in conventional classrooms at the end of kindergarten.	Children were tested on language, math, and social competences, as well as on executive functions.	The Tokens test was used to measure the overall quantitative knowledge of children.For Language and Vocabulary the Evaluation du Langage Oral test was used. The Evaluation des fonctions cognitives et Apprentissages ws used to test for Phonological awareness while Evaluation Des fonctions cognitives et des Apprentissages was used to test the reading ability. The Woodcock-Johnson III was used to te…	Language, Vocabulary, and Math	Social Problem Solving and competence					Executive functions including Short-term and working memory, Self regulation, and Planning.	The reading skills of children from Montessori classrooms were higher than the reading skills of children from conventional classrooms (with a very large size effect of 0.68). Children from the Conventional-public group reported being less competent with reading than children from both the Montessori-private group. There was a main effect of Group on the tests measuring math problem solving and q…
Michael Davies	2019	Evaluation of a School-led Sustainable Class Wide Intervention Programme to Improve Elementary Children’s Social Emotional and Academic Performance	10.1080/1034912X.2019.1695756	Australia	Oceania	Longitudinal Study	School	5-9 yrs	0	0	Varied between 317 (2013) and 273 (2015) students and 27 teachers	Preparatory year to Grade 3	Students	Social Skills Improvement System (SSIS)	3 yrs	A pre-test post-test intervention evaluation design was used to examine the effects of the SSIS-CIP intervention on the social behaviour and academic performances of students as assessed by their classroom teachers within each year.SSIS-CIP is implemented with an entire class of students (18 to 25 children) and most often conducted by a teacher or counsellor. It is a 10 to 12 week programme of th…	Student performance in teacher aministered test for social behaviour and academic performance	SSIS Performance Screening Guide (SSIS PSG) measured the student performance against age- or grade-level expectations for (a) prosocial behaviour, (b) motivation to learn, (c) reading, and (d) mathematics.The NAPLAN annual assessment for all Australian students in Years 3, 5, 7 and 9 is made up of tests in the four areas (or ‘domains’) of reading, writing, language conventions (spelling, grammar …	Reading and mathematics	Social behaviour indicators routinely collected showed improvement in social emotional development of the hidre when the intervetion wa implemented. Behaviour incidents and school disciplinary absences declined prominently, resulting in an overall improvement in the school culture.						Increases in academic achievement of students over each of the three years was documented across the Reading and Math scores on the PSG, and the Academic Competence score within the RS. Moreover, NAPLAN test scores across each domain of Reading (R), Writing (W), Spelling (S), Grammar and Punctuation (GP), and Numeracy (N) steadily increased over the time that the SSIS CIP was operating within the…
Jennifer Dobbs	2006	The association between preschool children's socio-emotional functioning and their mathematical skills	10.1016/j.appdev.2005.12.008	USA	North America	Cross-sectional Study	School	Mean age 56.6 months	54	54	108	Preschool children	Students	Early math intervention	Not Reported	The intervention involved a menu of 85 math-focused activities from which teachers selected. The activities used a range of approaches (e.g. books, music, games, discussions, and group projects) designed to be fun for the children and relevant to the following skills that the literature suggests are important; counting, recognizing and writing numbers, 1 to 1 correspondence, comparison, change op…	Teachers' ratings of the children's socio-emotional strengths and emergent math ability	Test of Early Mathematics Ability, Devereux Early Childhood Assessment (DECA), Devereux Early Childhood Assessment (DECA) to test for within-child protective factors of initiative, self-control, and attachment. The Teacher's Report Form of the Child Behavior Checklist was used to rate the frequency of externalizing and internalizing symptoms displayed by each child.	Performance in Mathematics test							Participation in the intervention significantly increased children's mathematics scores.Initiative, self-control, and attachment were each positively related to children's math skills. Children's problem behaviors, including withdrawal, social problems, and attention problemswere correlated with math skills, as were the subscales of withdrawal, social problems, and attention problems. Socio-emoti…
Ghaleb H. Alnahdi	2022	Teachers’ Implementation of Inclusive Teaching Practices as a Potential Predictor for Students’ Perception of Academic, Social and Emotional Inclusion.	10.3389/fpsyg.2022.917676	Saudi Arabia	Asia	Cluster randomized trial	School	8-15 years	742	82	824	3rd-8th Grade	Students	Implementation of inclusive teaching practices (differentiation and personalization) on students’ perceptions of inclusion.	Not Reported	Implemented Inclusive Teaching Practices (differentiation and personalization) to improve student's academic connectedness and performance	Improvements in students’ perception of inclusion regarding their social inclusion, academic self-concept and school wellbeing	Arabic version of the Perceptions of Inclusion Questionnaire (PIQ-S-AR) and the Inclusive Teaching Practices Scale (ITPS).	Academic self-concept and connectedness in school	Self-regulation: PAS as a manager had positive impact on both self regulation and academic performance while PAS as a mabnager did not have an effect on both self-regulation and academic performance.				Psychological attributes: PAS as a manger had positive effect on students' amotivation while PAS as a companiona had a negative effect on ammotivation		High levels of inclusive teaching practices strongly predicted students’ perceived emotional inclusion, social inclusion, and academic self-concept. Inclusive teaching practices were found to increase student's academic performance, school wellbeing and social inclusion.
Xianjie Peng	2022	Influence Mechanisms of Teacher Support and Parent Support on the Academic Achievement of Secondary Vocational Students		China	Asia	Exploratory study	School	Not Reported	710	0	710	secondary school	Students	Teacher support and Parent support.	1 yr	The teacher support included providing instructional guidance, giving effective feedback, and creating a positive classroom environment. The parent support included providing emotional and practical support, such as participating in their children’s learning, discussing educational plans with the children, and providing positive encouragement.	Academic achievement ( mathematics, language, and science), academic self-efficacy(students’ self-reported confidence in their ability to complete tasks successfully), academic motivation(students’ self-reported level of interest in learning), and psychological well-being(students’ self-reported levels of stress, anxiety, and depression).	The Teacher as Social Contact (TASC) Scale developed by Wellborn et al. (1988) to measure teacher support Perceived Social Support Scale (PSSS) (Blumenthal et al., 1987) to measure parent support The Student Self-Report For Middle School in Research Assessment Package scale (RAPS-SM) developed by Connell (1998), the Chinese Vocational School Student Learning Engagement Scale (Wei Xiangyun (2019)	Test scores ( mathematics, language and science)					Stress, anxiety and depression (psychological well-being indicated that students who received both teacher and parent support experienced significantly lower levels of stress, anxiety, and depression than those who did not receive any support)		Parent and teacher support had an interactive ppositive effect on the development of student's academic achievement. This support had more positive impact on students who had high mastery goal orientation than thise with low mastery goal orientation.
Vítor Coelho	2014	The Impact of a School-Based Social and Emotional Learning Program on the Self-Concept of Middle School Students	10.1387/RevPsicodidact.10714	Portugal	Europe	Quasi-experimental study	School	11-17 yrs	474	156	630	Middle-school	Students	Positive Attitude SEL Programme	2 yrs	This was a mix of group and one-on-one intervention. The programme entails 13 60 minute sessions per week conducted by a psychologist with the assistance of teachers to assess social self-concept, academic self concept and emotional self concept among students which presented disengagement and less appreciation for school.	Social self-concept, emotional self-concept, academic self-concept		Academic performance	The studennts in the intervention group showed an increase in social and emotional self-concept						The programme resulted to an increase in social self-concept and emotional self-concept but not academic self-concept. Academic self-concept decresed with time, however there was an overall increase in total self-concept. Bioys showed a higher improvement in emotional self concept than girls, hence the need to consider gender in the implmentation of interventions.
Valerie L. Johnson	2014	A Peer-Led High School Transition Program Increases Graduation Rates Among Latino Males	10.1080/00220671.2013.788991	USA	North America	Randomized control trial	School	16-25	94	174	268	Juniour high school	Students	Peer-Led peer group connection (PGC) Program	4 yrs	The program (grounded in the theories of social and emotional learning (SEL) which“teaches the skills we all need to handle ourselves, our relationships, and our work,effectively and ethically) utilized twelfth grade student peer leaders to create a supportive environment for incoming ninth grade students. The faculty advisors instructed upper class students to facilitate groups of approximately …	Graduation rates, student attendance rates, academic performance measures (including grades, standardized test scores, and course completion rates), and school-related social and behavioral measures (including disciplinary referrals, suspension rates, and school climate surveys).	student surveys, school records, and interviews with school administrators, state-level data on graduation rates, attendance rates, and standardized tests scores to compare outcomes across different schools and districts.	High school graduation	peer leaders co-facilitated hands-on activities and simulations that enabled freshmen to practice essential social, and emotional skills						Peers can be effective in delivering a school-based, social emotional learning intervention and that it is possible to intervene in the ninth grade to influence the probability of high school graduation. Malestudents who participated in the program during ninth grade were significantly more likely to graduate from high school within four years than male students in the control group. Female stude…
Youngji Sung	2014	Differential Effect of Social-Emotional Behaviors on Academic Achievement of Language-Minority Students	10.1007/s10566-014-9245-2	USA	North America	Longitudinal Study	School	N/A	10038	0	10038	Kindergaten- 5th grade	Students	Social development of language (English as a second language classes)	6 yrs	It compares the social skills development needs between english and non-English speaking children and offer the necessary support for the migrant students' social and academic development.A group intervention implemented by trained counselors. activities included group discussions, reflective writing, role-play.	Students' academic performance (e.g., grades, standardized test scores), social-emotional behaviors (e.g., self-regulation, problem-solving skills, and social competence), and language proficiency (e.g., English language fluency and proficiency).	Social Skills Rating Scale: Elementary Scale A (SSRS; Gresham and Elliott 1990), IRT-scaled reading and math achieve_x0002_ment scores were used	Test scores (reading and maths)	Increased social skills among non-native english speaking students; had a positive impact on reading and math performance. Intervention especially beneficial to students from poor backgrounds.						Students from low-income families who speak a language other than English showed extremely erratic development in all areas of social skills, and the group of students who showed the greatest improvement in social skills saw the greatest benefits. Language minority immigrant students who did not exhibit LEP at kindergarten and were living in poverty had unstable social development.
Su Youn Cho	2017	Effects of taekwondo intervention on cognitive function and academic self-efficacy in children	10.1589/jpts.29.713	Republic of Korea	Asia	Quasi-experimental Study	School	10-12 yrs	35	0	35	Elementary school	Students	Taekwondo training	1.3 yrs	Group intervention administered by a martial arts trainer. The program constituted martial arts training which includes physical intensity exercises, kicks, poomsae, gymnastics and cool down stretching.	Cognitive function, academic sel-efficacy,	Academic self-efficacy was measured using the scale developed by Kim and Park, which consists of 3 subordinate factors: Self-confidence, Self-regulatory Efficacy, and Task Difficulty Preference	Self-confidence, Self-regulatory Efficacy, and Task Difficulty Preference	self-confidence (scores increased after the intervention)	Taekwondo physical exercises which were directly linked to improved cognitive functions and self-confidence		Color-Word scores were higher in the intervention group			The intervention group posted higher colour word test scores thus improved cognitive function. Students also showed improved academic self-efficacy , which is correlated with improved academic achievement.
Stepeh R. Lassen	2006	The Relationship of School-Wide Positive behaviour Support to Academic Achievement in an Urban Middle School	10.1002/pits.20177	USA	North America	Longitudinal Study	School	12 yrs	623	0	623	Middle - school	Students	school-wide Positive Behaviour Support intervention	3 yrs	This group intervention focused on students' social development while reducing the need for disciplinary actions (i. e office disciplinary referrals). Teachers trained to implement the intervention, focused on providing teachers with classroom management strategies and techniques to effectively deal with challenging student behavior. Posters were diplayed on hallways, cafeteria to showacse the es…	Academic performnace, problem behaviour, school suspensions (Academic achievement was measured by standardized test results in reading, math, and science. Student self-report was measured by survey items concerning student perceptions of the school climate and the effectiveness of the positive behavior support program. Teacher report was measured by survey items regarding teacher perceptions of t…	The School-wide Evaluation Tool (SET; Horner et al., 2004 (designed to assess and evaluate the features of behavioral support systems within a school over time.)	Standardized math and reading scores			Suspensions reduced, thus indicating a positive behaviour change amongst students				The program had a positive impact on academic performance (maths, science and english). The implementation of SWPBS was associated with a decrease in disciplinary referrals and suspensions, as well as an improvement in behavior ratings. Although students behaviour has an influnce on academic outcomes, the relationship was minimal. Other factors influnce academic outcomes e. g instruction strategi…
Giuseppe Sorrenti	2020	The Causal Impact of Socio-Emotional Skills Training on Educational Success	10.2139/ssrn.3553837	USA	North America	Experimental study	School	5 yrs	(28 schools)	(28 schools)	1675	Primary school	Students, parents	The PATHS Traning Programme	15 yrs	A teacher-led program that teaches coping mechanisms, decision making and is aimed at fostering children’s self-control, emotional understanding, and social problem solving skills. Children learn self-control thgrough breathing techniques, role playing situations by practicing ignoring, interpreting and handling teasing of other children. Used stoplight approach to learn systematic decision makin…	Academic outcomes, socio-emotional development, parent-child interactions, school related behaviour e. g homewrok completion, class disruption	Social Behavior Questionnaire (SBQ) (Tremblay et al. 1991; Murray et al. 2019) (measures of child behavior) the Alabama Parenting Questionnaire (APQ) (Shelton, Frick, and Wootton 1996)( measures of parenting practices).	primary school grades, high school admission test scores, (Treated children had a higher chance of attending and complete academic high schools than the control group, higher graduation rates) Improved grades for the treatment group.	Self-control, patience, Decision-making strategies, social problem solving ,Self-esteem, Emotional intelligence ( students were less impulsive and disruptive after the intervention)		Treated stuidents exhibited improved classroom behaviour	Improved test scores			The intervention led to reduced anxiety and disruptive behaviours among children. It also improved parenting styles as cases of corporal punishment reduced. The intervention resulted to improved trest scores.
Cheryl L. Somers	2020	Academic Achievement Among a Sample of Youth in Foster Care: The Role of School Connectedness	10.1002/pits.22433.	USA	North America	Cross-sectional study	School	9 yrs	363	0	363		Students	Intervention aimed at fostering school connectedness among vulnerable population	5 yrs	The intervention focused on maltreated children in foster care, a 9-month mentoring and skills group program Youth and their current caregivers were interviewed by separate interviewers at their homes	Academic outcomes, disciplinary referrals, school connectedness, future orientation	Psychological Sense of School Membership (PSSM) total scale, (measured school connectedness)	Grades (English/ Reading, History/ Socila science, Math and Science)							Students who reported higher feelings for school connectedness posted higher grades. Boys also experienced more discipline referrals and placement changes than girls.
Solange Denervaud	2019	Beyond executive functions, creativity skills benefit academic outcomes: Insights from Montessori education	https://doi.org/10.1371/journal.pone.0225319	Switzerland	Europe	Cross-Sectional study	School	7-13 yrs	(13 Montessori classes) 208	(8 Montessori classes)	208	Kindergaten and elementary school	Students	Montessori Education program	2 yrs	This a group is an education program inclined to equip learners with scholastic, cognitive and social skills. Executive functions were tested by two types of tasks: a) selective attention (inhibition) and (b) cognitive flexibility. Creativity was measured using both divergent and convergent abstract drawing items from a standardized test Academic outcomes were assessed through oral comprehension,…	Executive functions, Academic outcomes, self-reported well-being, creativity	the Flanker fish task( measured executive functions) ,Pierre Lecocq’s “Epreuve de Compre´hension Syntaxico-se´man_x0002_tique” (E.CO.S.SE)(measured academic outcomes), questionnaires were used to measure self-reported well being at school	Oral comprehension, early reading competence, verbal problems			Students in the intervention group had instrisically driven executive control, since they were trained on more autonomous thinking behaviour (thus higher creativity). They also had more balance global development (which also predected highacademic performance)	The intervention group was found to have higher creative thinking capabilities than the control group.			Montessori schoolchildren score higher grades than their same age counterparts from traditional schools, as well as in working memory, convergent and divergent creativity tasks. Executive funtions aside, creative competence is positively related to academic performance in the Mentessouri group, indicating good execution of self-generated ideas.
Candy Skyhar	2020	Promoting Numeracy Through a Family Math Night	https://www.semanticscholar.org/paper/Promoting-Numeracy-through-a-Family-Math-Night.-Skyhar-Nantais/19cf11b379c3bb0621bb55d73633d2cae00ef53f	Canada	North America	Quasi-experimental Study	Home	N/A	80	0	80	N/A	Students	Family Math Nights	1 day	A school-sponsored program where students, parents, terachers and siblings engage in learning mathematics in a relaxed, non-threatening supportive (home) environment.	Logical thinking, place value, comparing and ordering numbers	Asurvey given to the participants before and after the Family Math Night event. The survey included questions about parents’ and children’s feelings towards math and their perceptions of their own numeracy abilities.	Numeracy skills							The engagement created positive connections between parents, teachers and the communitry. Students involved improved their numeracy skills.
Anat Shoshani	2016	Effects of the Maytiv positive psychology school program on early adolescents' well-being, engagement, and achievement	10.1016/j.jsp.2016.05.003	Israel	Europe	Quasi-experimental study	school	13.5 yrs	1262	1255	2517	Middle school	students	Mytiv Program	2 yrs	This was a group intervention administered to teachers. Theprogram is aimed at improving students' psychosocial and socio-emotional well-being and achievement. Teachers were trained by psychologists on positive psychology so as to impart the same gto their students.	Academic functioning, motivation	the Positive and Negative Affect Schedule (PANAS), the Perceived School Climate Scale (PSCS), the School Engagement Scale (SES), the Puberty Development Scale (PDS), the Self-Compassion Scale (SCS), the Rosenberg Self-Esteem Scale (RSES), and the Academic Achievement Test (AAT).	GPA (self-reported grades in math, English, and Hebrew )	self-reported positive and negative emotions, their self-reported levels of optimism and hope, and their self-reported resilience.						Students in the intervention group exhibited improved emotional and social well-being, peer relations, emotional engagement, cognitive skills and GPA. Boys showed fewer negative emotions and more positive emotions than girls; and lower school engagement. Children from low economic backgrounds showed posted an improvement in positive emotions, peer relations and an increase in social belonging.
Stepeh B. Sheldon	2005	Involvement Counts: Family and Community Partnerships and Mathematics Achievement	10.3200/JOER.98.4.196-207	USA	North America	Longitudinal Study	school	N/A	1280	0	1280	Elementary and secondary school	Students	“Focus on Results in Math"	2 yrs	A group intervention examinining the effect the involvement of school, family and community on students school outcomes. Key contact members of each participating school completed surveys sent by the research team which sought to understand the school characteristics, students body composition;, schoo, family and community practices geared towards maths improvement; effectiveness of partnerships …	Proficiency on mathematics achievement tests, Student report card grades	Standardized tests ( assessed students' mathematics achievement), surveys (family and community involvement), Observational data was collected through interviews and field observations.	Mathematics performnace( grades)							More students in elementary schools showed improved mathematics results over time. Family involvement can help mediate the effect of decline of adolescents' motivation and achievement as they transition into middle school. Overall, family and community involvement activities helped students in learning and achievement in mathematics.
Ali Moazami-Goodarzi	2021	Training Early Childhood Teachers to Support Children’s Social and Emotional Learning: A Preliminary Evaluation of Roundies Program	10.3390/ ijerph182010679	Finland	Europe	Quasi-experimental Study	School	3–6 yrs (M=60.35 Months)	136	58	194	Elemtary School Children	Students, Teachers	The Roundies program, Learning Social-Emotional Skills the Fun Way	8 sessions (55 min each) for teachers and 19 sessions (45 min each) for children.	The roundies is designed to reinforce children’s social-emotional competency by promoting the pedagogical sensitivity of ECE professionals; (2) promoting children’s social-emotional competencies such as self regulation skills, prosocial skills, interpersonal relationships, stress-tolerance, and positive thinking; and (3) reducing behavioral problems in early childhood	Higher scores in the Strength and Difficulties Questionnaire (SDQ) after the intervention duration	A pre-test and post-test were conducted using Strength and Difficulties Questionnaire (SDQ) (to assess children's emotional, control, hyperactivity/inattention, peer relationship problems, prosocial behaviors)	prosocial behaviors (e.g., helping, sharing, and cooperating) in the classroom and elimination of disruptive behaviors	Children who received the Roundies program (IG) showed a more significant increase in their prosocial behaviors (e.g., helping, sharing, and cooperating) over time compared to the CG. For children in the IG, a more significant decrease in SDQ total difficulties over time was evident compared to the CG.					Teacher's satisfaction with the Roundies program (97% were satisfied)	Teachers reported improved teacher–child relationships, and positive social and emotional behaviors in children.Roundies SEL program was successful in developing children’s interpersonal and interaction abilities, promoting their relationship skills to function positively in peer groups, and guiding them towards ethically responsible and sustainable actions, respect other people, and membership i…
David J. Schonfeld	2015	Cluster-Randomized Trial Demonstrating Impact on Academic Achievement of Elementary Social-Emotional Learning	10.1037/spq0000099	USA	North America	Cluster randomized trial	School	N/A	692	702	1394	Elementary School	Students	PATHS Education curriculum SEL Intervention	5 yrs	Group SEL intervention. The PATHS curriculum was introduced to the intervention group. Aimed at equipping students with skills to find positive, nonviolent solutions to social problems. It contained lessons on emotional awareness and understanding, self control, interpersonal problem solving skills and developing Peer relations and enhancing self-esteem and social responsibility. Enhanced teacher…	academic achievement scores, effect of SEL activities on academic performance, social-emotional skills, and self-perception.	standardized tests(State Mastery Test (MT)), surveys and interviews to measure social-emotional skills and self-perception.	math, reading and writing test scores							1. Social-emotional learning (SEL) activities had a positive impact on academic achievement of elementary students in the intervention schools compared to the control schools. 2. Academic performance, social-emotional skills, and self-perception all improved in the intervention schools compared to the control schools. 3. Students in the intervention schools reported improved relationships with te…
Lauren Scher	2021	Examining the Effects of HOME WORKS! The Teacher Home Visit Program on Student Academic Outcomes	http://www.schoolcommunitynetwork.org/SCJ.aspx	USA	North America	Cluster randomized trial	School and Home	N/A	361	302	663	Grades 5 and 6	Teachers, families	HOME WORKS! Program	2 years	Group intervention involving teachers and parents implemented by a non-profit organization and participating school districts. The intervention included two home visits by teachers to improve their relationship with families and understand and a better understanding of academic challenges, the ability to discuss student growth and progress, and beneficial discussions about student behaviors. Pare…	School records, student achievement tests, and parent surveys ( changes in student attendance and academic performance (e.g., grades, test scores, and dropout rates, changes in parent involvement in their child’s education)	Qualitative data from interviews and focus groups with teachers, parents, and students to assess the perceived impact of the HOME WORKS! program.	School grades, dropout rates				test scores			Teachers created strong connections with families. There was no significant difference in school performnace (grades, test scores) between students in the intervention group and control group.
Teresa Pozo-Rico	2020	Can Academic Achievement in Primary School Students Be Improved Through Teacher Training on Emotional Intelligence as a Key Academic Competency?	10.3389/fpsyg.2019.02976	Spain	Europe	Quasi-experimental study	School	N/A	51 teachers 1403 students	23 teachers 666 students	74 teachers 2069 students	Primary school	Teachers, Students	Implementing Emotional Intelligence to Improve Academic Outcomes	7 weeks	A group intervention involving both teachers and students. The first group of teachers (n = 23/n=645) were trained to use a face-to-face method to implement EI in their teaching to improve academkc outcomes, the second group (n = 28/n=758), the teachers were trained to use an e-learning gamification method, third group of teachers (n = 23/n=666) served as the controls and did not receive any spec…	changes in the students’ academic achievement( comparing the academic performance of students before and after the intervention), self-reported emotional intelligence, and self-reported academic motivation.	Satisfaction survey( determining teachers’ degree of satisfaction with the 7-week training program), Students school records (measured academic performance).	Scores in the following disciplines were obtained: Natural Science, Social Science, Spanish Language and Literature, Mathematics, Foreign Language, Regional Language, Physical Education, and an average grade (an average of the scores obtained in each area of knowledge).							Students in the experimental groups posted higher average academic sores than those in the control group. Results posted by the two intervention groups shpowed that the game-based group had better performance than the face-to-face group.
Kathryn E. Perry	2007	Teaching practices and the promotion of achievement and adjustment in first grade	10.1016/j.jsp.2007.02.005	USA	North America	Quasi-experimental Study	School	N/A	154	0	154	Elementary school	Students	Teaching Practices that provide social and cognitively rich instructional support on first grade students' academic, behavioral, and socio-emotional adjustment	12 weeks	A group intervention implemented by teachers and trained researchers attending to students' interest and initiative, providing appropriately challenging learning opportunities, and creating positive social relationships. ( Teachers provided small cooperative group activities that promote peer interactions, facilitating prosocial or interpersonal problem solving skill e.g dealing with conflicts, e…	Student achievement scores on standardized tests, teacher ratings of student performance, student self-reports of adjustment, and parent reports of student adjustment.	Standardized tests( academic achievement), Pupil Behavior Rating Scale (PBRS — Lambert, 1989), One-on-one interviews (assessed child perceptions of academic competence), The Early Childhood Classroom Observation Measure (ECCOM)(measured teacher practices)	letter recognition, letter–sound recognition, and reading fluency, skill learning, interest and motivation to participate in school	Interpersonal and intrapersonal behaviour was assessed, teachers warmth/ responsiveness towards children, support for interpersonal skills, support for communication skill,student engagement and individualization of learning activities; are highly associated with promoting socio-emotional adjustment in first grade students.						Instructional practices that emphasize student engagement, active learning, and individualized instruction were particularly effective in promoting both academic achievement and socio-emotional adjustment. Teachers who developed positive relationships with their students and provided consistent and meaningful feedback had a positive influence on student achievement and adjustment. Teaching practi…
Robert L. Nix	2013	Promoting Children's Social-Emotional Skills in Preschool Can Enhance Academic and Behavioral Functioning in Kindergarten: Findings from Head Start REDI	10.1080/10409289.2013.825565.	USA	North America	Randomized Control Trial	School	4 yrs	356	N/A	356	Pre-school	Students	Head Start REDI Intervention	2 yrs	A group intervention implemented by teachers with the help of REDI coaches to enhancing impact on the preschool acquisition of language/emergent literacy skills and social-emotional skills that were most central to later success. Teachers were trained on positive classroom management practices, emotion coaching, and speaking to children in ways that foster language development (e.g., questions, r…	social-emotional skills and academic functioning of the children	The 36-item Print Knowledge subscale of the TOPEL (Lonigan et al., 2007) (assessed ability to name letters and words), The 63-item Phonemic Decoding subscale of the Test of Word Reading Efficiency (Torgesen, Wagner, & Rashotte, 1999), which evaluated phonemic knowledge and word attack skills, The 100-item Story Recall subscale from the Woodcock-Johnson Tests of Achievement III – R (Woodcock, McGr…	Reading skills, Vocabulary, emergent litreracy skills	Growth in emotion understanding and competent social problem solving was significantly associated with growth in positive social behavior.						The children in the REDI intervention showed more positive adaptation than children in the “usual practice” Head Start control group Growth in emergent literacy skills was significantly associated with growth in emotion understanding and competent social problem solving. Preschool gains in both cognitive skills (e.g., emergent literacy skills) and social-emotional skills (e.g., emotion understand…
Niloofar Bavarian	2013	Using social-emotional and character development to improve academic outcomes: a matched-pair, cluster-randomized controlled trial in low-income, urban schools	10.1111/josh.12093	USA	North America	Longitudinal Study	School	N/A	1170	0	1170	Elementary and middle-school	Students	Positive Action (PA) program	6 yrs	A group scocio-emotional and character development program which had the following characteristics: 6-8 waves of engagement where students self-reported on disaffection with learning, academic grades, teacher ratings of students' academic ability and motivation, school district reported average daily attendance rates for each school, socio-economic and demographic factors of the sudents .	academic performance, (measured by standardized tests), student self-reported measures of academic engagement	standardized tests, student surveys, and teacher surveys.	Math performance (test scores), Reading skills						The role of gender as a moderating factor in intervention effectiveness. Girls seemed to perform better in maths than boys whereas boys performed better in reading. Absenteesm( the program improved school attendance and resulted to a drop in absenteesm)	PA significantly improved growth in academic motivation and mitigated disaffection with learning A positive impact of PA on absenteeism. Improved reading for African American boys and cohort students transitioning between grades 7,and on math for girls nad low-income students
Mel McCree	2018	The Hare and the Tortoise go to Forest School: taking the scenic route to academic attainment via emotional wellbeing outdoors	10.1080/03004430.2018.1446430	United Kingdom	Europe	Cohort Study	School	5-7 years upto 7-10 years	11	0	11	Primary School	Curriculum	Forest School and outdoor learning program	3 yrs	A group intervention targetting economically and emotionally disadvantaged and specila needs children. Had the following chracteristics: Visits to a local woodland and worldlife trustee reserve every week for 3 years and during holidays. Forest Model activities including playful, place_x0002_based and nature-based, including scavenger hunts, wild art, basic whittling, creative crafts, shelter bui…	academic performance, social and emotional development, physical activity, and nature connection.	Structured questionnaires, interviews with students and staff, and observations of the Forest School activities.	General academic performance (grades, conduct at school, which improved among the intervention group).	Students found ways to self-regulate during the sessions. Regular visits to the same woods provided a vital familiar place to process their emotions and enjoy a stable relationship with people and place. Improved social skills and social skills	Students played run around games, tree climbing among other physical engagements, which increased their confidence and social skills	Improved self-confidence among the students			Students established resilience through the emotional space provided (physical space and time in which the children are free to be themselves and express their emotions)	For disadvantaged children, wellbeing through outdoor learning is important in improving school-readiness and achievement It provide a safe and supportive environment for children to explore and to express themselves.
Meghan P. McCormick	2015	Social-Emotional Learning and Academic Achievement: Using Causal Methods to Explore Classroom-Level Mechanisms	10.1177/2332858415603959	USA	North America	Quasi-experimental Study	School	N/A	225(students) 57 (teachers)	210 (students) 63 (teachers)	435 students 120 teachers	Kindergaten	Students	INSIGHTS Intervention	2 yrs	A group preventive school-based inter_x0002_vention designed to enhance the development of low-income primary grade students at-risk for academic and behavioral difficulties. Had the following characteristics: Included teacher sessions, parent sessions and universal classroom sessions. Curriculum materials included puppets, workbooks, flash cards, and videotaped vignettes and aimed to help studen…	student academic achievement, teacher-reported outcomes related to student behavior,engagement, and social-emotional skills, student self-reports of social-emotional skills and student-reported academic efficacy, classroom environment and teacher-student interactions.	Student–Teacher Relationship Scale (STRS; Pianta, 2001)(measured teacher–child relationship quality), Sutter–Eyberg Student Behavior Inventory(measured child behavior problems), Classroom Assessment Scoring System (CLASS; Pianta, La Paro, et al., 2008)(measured Classroom emotional support and classroom organization), the Letter_x0002_Word Identification and Applied Problems subtests of the Woodco…	Reading and Math achievement test scores	Emotional support inclided dimensions of teacher practices (positive climate, teacher sensivity, regard for student perspectives			Instructioinal supports which enhanced the ability of students to engage in higher level thinking, integrate knowledge across disciplines and apply knowledge in real world problems.			Emotional support and organization in classroom settings are particularly important for the development of low-income urban children’s elementary school math skills. Reading achievement, was less related to the pattern of social interactions at the classroom level and more associated with individual time spent on-task practic_x0002_ing literacy skills.
Christopher A. Mallett	2012	The School Success Program: Improving Maltreated Children’s Academic and School-related Outcomes	10.1093/cs/cdr004	USA	North America	Longitudinal Study	school	N/A	615	0	615	Kindergaten-12th grade	Students	School Success Program	9 yrs	A one-on-one intervention aimed ar providing a consistent adult to tutor and mentor maltreated children(and families) at their homes. Implemented by the Children Services Agency (Ohio) Children and tutors/mentors met between 1-4 hrs/week (or more if necessary), depending on the child’s needs, and focus their individualized educational support plans on Ohio benchmarks (the standard in all Ohio pub…	Assessment of the work, relationship building, and outcomes/ progress of the tutors/mentors, children, and the children’s families.	Woodcock Johnson Assessment( measured test scores),	Proficiency tests in witing, math and reading.				Math reasoning, math calculation abilities were assessed		Boys in the program made gains at a quicker pace than girls( there is need to consider the gender issue while designing interventions)	Both minority and nonminority children and youths made gains at almost an identical pace, something that did not happen for their nonmaltreated peers in these public school districts. Improved academic performance and school-related outcomes.
Jacqueline P Leighton	2018	A pedagogical alliance for academic achievement: Socio-Emotional effects on assessment outcomes	10.1080/10627197.2017.1411188	Canada	North America	Longitudinal	School	6-12 yrs	262	0	262	Grades 1-6	Students	Pedagogical Alliance for Academic Achievement.	1 yr	A group socio-emotional intervention that focused on developing relationships between teachers and students and creating a supportive and inclusive learning environment. Included activities that promoted student engagement, such as setting and discussing expectations, providing feedback, and engaging in meaningful dialogue, building trust and encouraging collaboration between teachers and student…	Academic outcomes (including grades, test scores, and completion rates), social-emotional outcomes (improved teacher-student relationships, increased student engagement, and improved self-regulation), students’ attitudes towards school (academic motivation and self-concept).	Student and teacher surveys, teacher interviews, and student work samples	Grades, test scores completion rate	teacher-student relationships, student engagement, and self-regulation.						Students’ academic performance improved, as evidenced by higher grades, test scores, and completion rates. Improved teacher-student relationships, increased student engagement, improved self-regulation, and improved attitudes towards school.
Lauretta M. Brennan	2013	Indirect Effects of the Family Check-Up on School-Age Academic Achievement Through Improvements in Parenting in Early Childhood	10.1037/a0032096	USA	North America	Longitudinal study	Home	2-7 yrs	731	0	731	N/A	Students, Families	Family Check-Up	2 yrs	The intervention examined parents' use of positive behavior support and if it can indirectly improve academic achievement scores at school age. Craegivers and their child performed a series of clean up tasks, then delayed gratification tasks, teaching tasks(completed by alternate caregiver and child), free plays presentation of inhibition-inducing toys and a meal preparation and lunch task to ass…	changes in parenting practices, parental involvement in activities, parenting self-efficacy, and academic achievement.	Woodcock-Johnson III Tests of Achievement (measured academic achievement), Eyberg Child Behavior Inventory (ECBI)(measured conduct problems in children), Relationship Process Code(Coding of videotaped parent– child interactions).	Reading, math, and written expression	positive behavior support in intervention families (led to higer academic outcomes to children in the intervention group)						Improved parenting practices, parental involvement in activities, and parenting self-efficacy in early childhood, which in turn resulted in improved academic achievement in reading, math, and written expression in school-aged children.
Karen L.Bierman	2017	Enriching Preschool Classrooms and Home Visits with Evidence-Based Programming: Sustained Benefits for Low_x0002_Income Children	10.1111/jcpp.12618.	USA	North America	Randomized Control Trial	School and Home	4-5 yrs	393	173	556	Pre-school	Students	REDI Headstart program	6 monhts	A group, home and school intervention implemented by trained researchers. 33-lesson program uses stories, puppets, photographs, and role-play demonstrations to introduce social-emotional skills, such as cooperation, emotional understanding, and self-control, an interactive reading program, sound games to teach phonological awereness. Teachers coached the use of positive classroom management pract…	Assessments of children's academic, socio-emotional, and language skills, parent-child interactions and family-level outcomes	Peabody Picture Vocabulary Test, the Woodcock-Johnson III, the Social Skills Rating System, the MacArthur Story-Stem Battery, and the Home Interview for Parents of Preschoolers, Learning Behaviors Scale, Social Competence Scale (Conduct Problems Prevention Research Group [CPPRG], 1995), Perceived Competence Scale for Children, Friendship Questionnaire (Bierman & McCauley, 1987), eAcademic Compete…	Measures of vocabulary, reading, math, and writing, general cognitive ability and problem-solving.	Improved socila emotional skills, social competence			Reading skills (improved)	Home-visiting intervention produced additional benefits in child mental health (perceived social competence and peer relations)		Evidence-based classroom and home visit programs had a positive effect on academic achievement, socio-emotional development, and language skills. The effects were sustained over time, with significant improvements in academic achievement, language skills, and parent-child interactions. Programs also led to positive family-level outcomes, such as improved parent involvement in children's learning.
Karen L.Bierman	2010	The Effects of a Multiyear Universal Social–Emotional Learning Program: The Role of Student and School Characteristics	10.1037/a0018607.	USA	North America	Longitudinal Study	School	N/A	2937	0	2937	Elementary school	Students	Fast Track PATHS Curriculum	3 yrs	A multiyear universal social–emotional learning (SEL) group intervention implemented in elementary schools by the Fast Track educational consultants.Activities and included self-reflection, discussion and role-playing, problem-solving, and goal-setting. New lessons cretaed at each grade level incoporating parent training and socila skill training components of the Fast Track program.	Social-emotional skills, attitudes, and behaviors, as well as teacher-reported measures of student social-emotional skills, attitudes, and behaviors, role of student and school characteristics in predicting intervention effectiveness( gender, race/ethnicity, family income, and school size.)	Teacher Observation of Classroom Adaptation— Revised (TOCA–R; Werthamer-Larsson, Kellam, & Wheeler, 1991)(mesaured child behaviour), TOCA–R and SHP in a structured interview, Peer nominations	student self-reported and teacher-reported measures of academic performance	measures of self-efficacy, self-regulation, internalizing behaviors, externalizing behaviors, social problem solving, and prosocial behavior, school climate, as measured by teacher-reported measures of student connectedness to school. (Intervention were moderated by student and school characteristics, with students from low-income households, Hispanic students, and students in larger schools show…			Cognitive engagement - the use of self-regulation learning strategies, and the perceived usefulness of these strategies			Effects of the intervention were moderated by student and school characteristics, with students from low-income households, Hispanic students, and students in larger schools showing greater improvements in social-emotional functioning than their peers. The intervention to significant improvements in students' social-emotional skills, attitudes, and behaviors, as well as school climate
Steven W. Hemelt	2013	Elementary School Interventions: Experimental Evidence on Postsecondary Outcomes	10.3102/0162373713493131	USA	North America	Randomized Control Trial	School	N/A	520 in first intervention group and 452 in the second intervention group	1339	2311	Elementary school	Students	Good Behavior Game (GBG) and Mastery Learning (ML)	2 yrs	Two light-touch elementary school interventions to estimate long-run impacts on postsecondary attendance and attainment. The first is a classroom management technique for developing behavioral skills in children (Good behavior game). The second is a curricular intervention aimed at improving students’ core reading skills. Interventions were a small-group tutoring and whole-class instruction. The …	Academic achievement, attendance, social-emotional learning, and postsecondary outcomes such as high school graduation rates, college enrollment rates, and college completion rates.	Standardized test scores, teacher and student surveys, and administrative records.	Standardized test scores (reading, math, and science achievement.)	Self-efficacy, self-regulation, and social problem-solving skills.					Gender issues on interventions: The curricular intervention found heterogeneous effects by student gender and initial level of academic achievement.	The behavioral intervention benefits low_x0002_performing students more than high-performers exposure to the curricular intervention influences college outcomes more for middle- to high-performing students. Students who participated in the small-group tutoring intervention had higher academic achievement, increased attendance, improved social-emotional learning, and higher postsecondary outcomes …
Helen Baker-Henningham	2021	Effects of a Teacher-Training Violence Prevention Program in Jamaican Preschools on Child Behavior, Academic Achievement, and School Attendance in Grade One of Primary School: Follow up of a Cluster Randomized Trial	10.3389/fpsyg.2021.652050	Jamaica	North America	Cluster-randomized trial	School	3-6 yrs	181	183	364	Preschool	Students	Teacher-Training Violence Prevention Program	8 months	core content of the program included: (1) developing positive teacher-child relationships, (2) using praise and rewards, (3) preventing and managing child misbehavior, and (4) teaching social and emotional skills. Teachers and principals trained on the intervention program, inclass support sessions. Instruction focused on building positive relationships with children, being proactive to prevent b…	Child behavior, academic achievement, and school attendance in Grade One of primary school	Teacher questionnaires, child behavior surveys, and school records	Reading and math scores, attendance records	children’s ability to interact with peers, follow instructions, express emotions and prosocial behaviour.	physical aggression		Reading and math scores from the Grade One exams			The intervention had significant benefits on children's academic achievement, social skills and conduct problems.
Ángela Antúnez	2020	Engagement SPIRALS in Elementary Students: A School-Based Self-Regulated Learning Approach	10.3390/su12093894	Spain	Europe	Quasi-experimental Study	School	9-11 yrs	63	57	120	Elementary School students and teachers	Students, Parents	SPIRALS intervention program (School program of intercultural promotion, learning regulation, reading comprehension and study habits)	4 months	The aim of the program was to encourage students’ cognitive, emotional, and behavioral engagement (particularly Roma students) through the development of the skills needed to set engagement-success spirals, within and outside the school. Program was implemented in a truly inclusive learning environment with the whole classes.	Changes in the students’ school engagement and academic self-concept, and general performance.	Student cognitive engagement- Self-regulation Processes of Learning Inventory–IPAA and questionnaire Instrumentality of self-regulation of learning. Student emotional engagement-Valuing of school education subscale, School identification subscale, the scale Emotional engagement. Student behavioral engagement- School compliance subscale and from the School participation subscale. Academic self-con…	Performance in different subjects (percentage of subjects passed, numerical grade in each subject) including the subject of Spanish Language (numerical grade, Reading Comprehension, adaptive behavior (referring to good classroom behavior and attendance), and (b) involvement in academic tasks and learning both in and out of school	Student emotional engagement was operationalized as (a) the value placed on education and identification with the school and (b) the attitude towards school tasks.						Students in the experimental group, compared to the control group, showed higher school engagement (cognitive, emotional, and behavioral), academic self-concept, perceived climate of support, reading comprehension, and academic performance. The differences between the control and experimental groups will be larger in school engagement (cognitive, emotional, and behavioral), and perceived climate …	showing that intervention improved students’ behavioral engagement and academic performance, although the improvement in the latter was marginal. This may be due to the fact that students did not participate in the program for long enough to develop and transfer self-regulated learning strategies to their other schoolwork.
Anna Daunic	2021	Efficacy of the social-emotional learning foundations curriculum for kindergarten and first grade students at risk for emotional and behavioral disorders	10.1016/j.jsp.2021.03.004	USA	North America	Cluster Randomized Controled trial	School	56.6 months old	613 Students, 158 Teachers	541 Students, 144 Teachers	1154 students and 302 teachers	Elementary School students and teachers	Curriculum	SELF curriculum (Social-Emotional Learning Foundations)	3 yrs	Designed SELF small-group lessons to be taught by the classroom teacher during the literacy block or intervention period. Lessons are organized using 16 children’s storybooks that address SEL topics within the five critical competencies identified by CASEL (self-awareness, self-management, social awareness, relationship skills, and responsible decision-making). Involved reading of storybooks with…	Teachers completed the Behavior Rating Inventory of Executive Function2 (BRIEF2), Devereux Student Strengths Assessment (DESSA), Clinical Assessment of Behavior Teacher Rating Form (CAB-T), and Student Knowledge Questionnaire (SKQ) online using the Qualtrics platform prior to the onset of intervention and near the end of the school year to coincide with completion of SELF implementation in the tr…	BRIEF-2 and HTKS Head-Toes-Knees-Shoulders (evaluated emotional and behavioral self-regulation. Devereux Student Strengths Assessment (DESSA) and SELF knowledge measured SELcompetencies. CAB-T analyzed successful school adjustment, SELF Vocabulary Measure (SELF Vocab) measured social-emotional language development	(teacher reported) Social-emotional vocabulary development by the students	SELF promoted knowledge of important social-emotional concepts, including self-awareness, self-management, and responsible decision-making			SELF teachers perceived their students as more capable of cognitive processes, such as recognizing the physiological signs of emotions, evaluating the consequences of a given response, and developing multiple solutions to social problems			SELF had a positive effect at posttest on self-regulation, Socio-emotional regulation, general behavioral functioning, and SEL vocabulary (SELF Vocabulary).	Socio-emotional learning through interventions such as SELF helps children to develop vocabulary that they can then use to display and describe their emotions and feelings thus promoting their interactions withtheir peers. Additionally, it helps students to develop self-talk through the amassed vocabularly which they can then use to help them to control the interplay between emotions and cognitiv…
ANDREA M. FOSCO	2004	Multiage Programming Effects On Cognitive Developmental Level and Reading Achievement in Early Elementary School Children	10.1080/02702710490271800	USA	North America	Not Reported	School	5 to 8 years	104	109	213	Kindergarten and Elementary Students	Curriculum	Multiage classrooms	1 yr	The multiage programmimg intervention involved placing children from an age span that is greater than one year in the same classrooms. The classrooms are similar to each other in terms of socioeconomic status, abilities, interests, and needs of the children. The curriculum and teaching practices are developmentally appropriate, and the use of an integrated curriculum seeks to foster each child’s …	Cognitive developmental level and reading achievement of the students after the intervention	Piagetian cognitive developmental level tests for cognitive development, Kaufman-Brief Intelligence Test (K-BIT), sociometric rating scales, and Wide Range Achievement Test-3 (WRAT-3) for reading and word decoding,	Reading ability				Children in the multiage classrooms attained a higher cognitive developmental level at a faster pace compared to children in traditional classrooms.			Children in the multiage classrooms attained a higher cognitive developmental level at a faster pace compared to children in traditional classrooms. The results also indicated that children functioning at a higher cognitive developmental level scored significantly higher on reading achievement, however, there were no differences on reading achievement between the two class types (multiage and tra…	The WRAT-3 test for reading was not apprpriate for testing whether reading ability differs with classroom type because it assessed whether a child could read and not how they read.
María-José Mira-Galvañ	2020	Design, Implementation and Evaluation of an Emotional Education Program: Effects on Academic Performance	10.3389/fpsyg.2020.01100	Spain	Europe	Quasi-experimental Study Design	School	9-12 yrs	45	41	86	Primary school	Curriculum	OKAPI program = O (Classroom Organization: routines, rules, operation, distribution of spaces, etc.), K (Cooperative Learning as a main methodology for the teaching-learning process) A (Positive classroom environment), P (Participation: Involvement of all members of the educational community) and I (Emotional intelligence: emotional education)	6 Months	The OKAPI program is based on a cooperative learning methodology where learners work together in a small heterogenous groups so that everyone can participate in the collective task. So students work together to learn. It involves students working together to achieve common goals and requires the contribution of all group members in order to fulfill individual and group objectives. Students are re…	Perfomance in assessment tests designed by the teaching staff	Emotional Quotient Inventory: Young Version (EQi:YV) for emotional and social functioning, Average grades in the main subjects (Maths, Catalan language, Spanish language, Social science, and Natural science).	Performance in (Maths, Catalan language, Spanish language, Social science, and Natural science).	The intervention slightly improved the soio-emotional competence of students on the intervention group.						Students in the experimental group slightly improve their academic performance and socio-emotional competence once the intervention program has been completed.	Cooperative learning offers a simple method to facilitate the daily SEL practice. ce. When students work together they improve their social competence through the interaction with their peers. At the same time they perform positive personal relationships and live the experience of building their social emotional competence in real situations. which supports the development of warm and supportive …
Elisabeth Conte	2023	Supporting Preschoolers’ Mental Health and Academic Learning through the PROMEHS Program: A Training Study	10.3390/children10061070	Portugal & Italy	Europe	Randomized Controlled Trial	School & Home	4-5 years			784	Pre school	Teachers &Children & Parents	Promoting Mental Health at Schools (PROMEHS)	1 yr	Group intervention implemented by psychologists and teachers.Teachers trained on teachers' mental health and students' and how to implement the intervention. Teachers implemented intervention schools for 12 wks Activities included storytelling, games, songs and role plays with academic content to support students' SEL according to the studnets' needs. Parents engaged the students in the activitie…	academic performnace, social emotional competencies	Social Skills Improvement System, Social Emotional Learning Edition Brief Scales—Student Form (SSIS-SEL,Strengths and Difficulties Questionnaire (SDQ),Academic Outcomes Questionnaire.	Test scores	Self-awareness, self-management, social awareness, and responsible decision-making						improved children’s SEL competencies and prosocial behavior, enhanced children’s academic outcomes
Carmel Cefai	2022	The effectiveness of a school-based, universal mental health programme in six European countries.	10.3389/fpsyg.2022.925614.	Croatia, Greece, Italy, Latvia, Portugal, and Romania	Europe	Randomized Controlled Trial	School, Home	3-18 years	4501	3288	7,789	Kindergaten, Primary School, Lower Secondary School		Promoting Mental Health at Schools (PROMEHS)	1 yr	Group intervention implemented by psychologists and teachers.Teachers were trained on teachers' mental health and students' and how to implement the intervention.through a guide handbook. Teachers implemented the progam in schools. Activities included storytelling, games, songs and role plays that were in harmony with academic content to support students' SEL. Parents engaged the students in the …			Test scores	elf-awareness, self-management, social awareness, relationship skills, and responsible decision-making						Improved SEL elements (elf-awareness, self-management, social awareness, relationship skills, and responsible decision-making) Higher Improved academic outcomes for primary and kindergarten children that those in secondary school.
Gwyne W. White	2023	Mechanisms for change: A theoretical pathway for a school-wide social–emotional learning initiative in an urban middle school	10.3389/fpsyg.2023.977680	USA	North America		School	10-16 years			1400	Kindergarten, Primary and Lower secondary school children	Teachers and students	School of Character Intervention	3 yrs	Community based participatory action approach, whole-school intervention model.Co-developed by the staff and meant to build positive adult climate. Hosted community hosting events.			Language Arts, Math, Science, and Social Students scores	disciplinary behaviours						Improved discipline and positive Sel perceptions improved academic performance.
Nicole B. Doyle	2023	Testing the integration of a teacher coaching model and a social-emotional learning and literacy intervention in urban elementary schools	10.1016/j.tate.2023.104232.	USA	North America	Quasi-exxperimental design	School		526	498	1024		Teachers	4Rs (Reading, Writing, Respect, & Resolution), Intervention) and 4Rs=MTP	1 yr	A group intervention involving teacher coaching, SEL curriculum (helping students develop skills such as self-awareness, self-management, social awareness, relationship skills, and responsible decision-making) and literacy. 4Rs+MtP isa one-on-one, video-based coaching and access to video exemplars of teaching practices. MTP coaching is structured, focusing on enhancing high-quality classroom inte…	Behavioral outcomes, academic performance, social-emotional competencies, instructional practices	Behavioral Assessment Scoring System for Children (BASC) Internalizing Problems Index,BASC Aggression Subscale, Prosocial/Communication Skills and Emotion Regulation Skills	Reading and Math test scores	Social interactions					school attendance rates	Improved academic perfomnace among the intervention group, improved social interactionsnand higher school attendance rates
Wanying Zhou	2024	“No changes, but I become more positive mentally”: A mixed-methods study of the impact of a combined SEL and MBP on behavior change and academic achievement among Chinese adolescents	10.1016/j.sel.2024.100038	China	Asia	Mixed methods quantitative and qualitative design	School	mean age 13.03 years	184	184	552	Elementary school	Students	Social and Emotional Learning (SEL) and Mindfulness-Based Program (MBP)	8 wks	A group intervention implemented by instructors. Entailed lessons on understanding one's brain, mindful awareness, understanding emotions, thiughts, relations with parents, reasoning, kindness and gratitude.	academic performance, behaviour and belief change	Test score , qurestionnaires	Test scores (Chinese, Mathematics, English, and Science,)	Attitude, behavioiur change, belief change						Imroved subject scores, improved peer relationships, well-being
Amanda E. Clifford	2024	Tender Shoots: Effects of a preschool shared reading and reminiscing initiative on parent-child interactions and for socio-emotional and self-regulation outcomes after school entry	10.1016/j.lindif.2024.102443	New Zealand	Oceania	Randomized Controlled Trial	Home	61-75 months	47	22	69	Pre-school	Parents and children	Tender Shoots Intervention	1 year	A pres-school parent education program aimed to promote parent-child interactions to support school transition, to foster language and literacy skills, to support socio-emotional and self-regulation development. Consisted of two modules: Rich Reading and Reminiscing (RRR)(book prompts to engage in elaborative and emotion-rich extra-textual discussions), Strengthening Sound Sensitivity (SSS), shar…	Literacy skills	Head-Toes-Knees-Shoulders task	Liteacy skills and l,anguagae use							Increase in socio-emotioanaland sekf-regulation competencies, Improved literacy skills
Yibing Li	2023	Impact of a schoolwide social and emotional learning implementation model on student outcomes: The importance of social-emotional leadership		USA	North America	cluster randomized controlled trial	School				2078	Elementary grade students		School Guide +PATHS program	2 years	A group intervention where teachers are trained on creating positive classroom climate and how to implement the intervention.helps the team document current SEL-focused activities throughout their school (e.g., in classrooms, across the building, through family and community partnerships) and to review potential data sources to monitor school-wide SEL implementation progress.	Test scores, social emotional leadership	Teacher Observation of Classroom Adaptation-Revised (TOCA-R),Assessment of Readiness for College and Careers (PARCC) , School records	Math and English test scores							There was no statistically significant diffrencrs between PATHS students and School guide studenst in academic performance
Bethany H. McCurdy	2024	Effectiveness and mechanisms of change of a mindfulness-based intervention on elementary school children: A cluster-randomized control trial	10.1371/journal.pone.0301028.	Spain	Europe	Cluster Randomized Comtrol Trial	School	7-12 years	155	158	313	Elementary school	Students	GrowingUp Breathing program	9 weeks	GrowingUp Breathing consists of nine 50-min sessions, with one session implemented each week across 9 weeks. The nine sessions are divided into three modules (i.e., Attention, Self-Regulation, and Kindness) plus an integration and summary session. Core practices (i.e., mindfulness meditation practices [mindfulness of the breath]) and exercises (i.e., activities to facilitate the understanding of …	Emotional regulation, academic achievement, well-being	Avoidance and Fusion Questionnaire-Youth, Short-Form Version (AFQ-Y8), Emotional Regulation Skills subscale of the Social Competence Scale - Teacher Version, Prosocial Behavior subscale of The Strengths and Difficulties Questionnaire - Teacher Version (SDQ), Peer Relationship Problems subscale of the SDQ-Teacher Version, Students' Life Satisfaction Scale (SLSS								MBI group showed a higher marginal increase of prosociality, a reduction of peer relationship problems, No significant changes in academic performnace between the MBI and WLC groups.
McCurdy, B.H	2024	Program evaluation of a school-based mental health and wellness curriculum featuring yoga and mindfulness	10.1371/journal.pone.0301028.	USA	North America	Non-Randomized Control Trial	School	7-13 yrs	461	420	881	Students	Elementary School Children (Grade 3-5)	Pure Power Yoga Mindfulness Program	Twice weekly for average 35 minutes for 2 yrs	A group play-based intervention delivered to students twice weekly as an assigned class by yoga instructors.Pure Power sessions were an average of 35 minutes and were held in designated school classrooms.Yoga and mindfulness instruction were delivered in four parts: open breathing, content instruction, posture/movement instruction, and rest	emotion regulation, academic achievement	Behavior Assessment System for Children, 2nd edition (BASC-2),Wide Range Achievement Test-Revised Spelling and Math scale scores (WRAT-R),The Response to Stress Questionnaire (RSQ								Relative improvement in spelling and math scores, improved children’s coping skills, emotional regulation
CRISTINA ISABEL GARCÍA NÚÑEZ	2024	Unlocking abilities: enhancing executive skills through play and movement in preschool physical education	10.7752/jpes.2024.01021	Spain	Europe	Single-Group Pretest-Posttest Design	School	5 years	20	0	20	Students	Pre-school children	Physical Education and play-based Intervention	Not Reported	A group intervention aimed at stimulating children's executive functions using physical and play activities such as music hoops, dancing , olaying with objects.	Executive functions, Academic outcomes, self-reported well-being, creativity	Use of flashcards, colored balls, hoops, and several musical instrument	Language and mathematics scores							Improved executive functions as shown by improvement in scores
Toth K.	2024	Investigating the academic attainment and progress of children in receipt of individual counselling: A matched comparison study of primary school age children in England	10.1002/capr.12741.	United Kingdom	Europe	Longitudinal study	school	6-11 yrs	6572	2575253	2581825	Primary school children	Primary school children	Place2Be Counselling services	10 yrs	Individualized mental health intervention implemented by trained counsellors. Comprised of individual counselling on a one- to-one basis sessions tailored specific to children's needs with regular check-ins over ten yrs	academic performance and progress	Records of academic performnce, Strengths and Difficulties Questionnaire (SDQ), Teacher Assessments	Standardized Test scores							Imroved academic outcomes for those who receive counselling to be at the same level with their counterparts. Improved in socioemotional development. Individual school-based counselling may be help-ful as a potential intervention for supporting vulnerable children's (defined as thoseidentified by schools or parents as in need of individual counselling) academic pro-gress in primary schools, as wel…
Mathias E	2022	Using Early Childhood Mental Health Consultation to Facilitate the Social–Emotional Competence and School Readiness of Preschool Children in Marginalized Communities	10.1007/s12310-021-09486-y.	USA	North America	Randomized Control trial	School	46.7 months	282	108	390	Pre school children	pre-school children	Early Childhood Mental Health Consultation	1 shool year	A mix of individual and group intervention implemenyed by consultants and socoial workers that entailed teachings on wellness e.g mindfulness and selfcare, : preventing problem behavior, (e.g., increased use of pre-corrections, routines), increased use of positive reinforcement (e.g., praise, incentives), appropriate response to challenging behavior (e.g., appropriate redirection, logical consequ…	socioemotional; learning, realtionships, academic outcomes	Positive Behavior Rating Scale (PBRS, The Social Emotional Screener (SES, Every Child Ready: Math Assessment (ECR:M;Every Child Ready: Language & Literacy	mathematics skills, language and literacy skills	Positive social behavior, socioemotional skills						Higher academic achievements in math, literacy and writing positive classroom behaviour, positive social and self-awareness
Carla Herrera	2022	Effects of the Big Brothers Big Sisters of America Community-Based Mentoring Program on social-emotional, behavioral, and academic outcomes of participating youth: A randomized controlled trial	10.1016/j.childyouth.2022.106742.	USA	North America	Randomized Control Trial	Community	9-14 yrs	379	385	764	Youth	School children	Big Brothers Big Sisters of America	13 months	Individualised community intervention where youth in the intervention group were matched to mentors. Recruitment involved whole family. Mentores were tarined using curriculum-based training. Agencies offered monthly contact support to families via phone or email.	Academic performance, social emotional development	Conduct Problems subscale of the SDQ, e Inventory of Parent and Peer Attachment, Self-Perception Profile for Children (SPPC; Test score records	academic performance, selfperception of academic ability, and skipping school)	prosocial behavior, social acceptance, parent–child relationship quality, misconduct, self-perception						Reduced depressive syptoms, emotional symptoms, peer problems and conduct problems, improved parent-child relationships. Impacts were not found for any of the threeschool-related outcomes tested (i.e., academic performance, selfperception of academic ability, and skipping school)
Silvia Diazgranados Ferráns	2022	The Cost-Effectiveness of an Accelerated Learning Program on the Literacy, Numeracy and Social-Emotional Learning Outcomes of Out-of-School Children in Northeast Nigeria: Evidence from a Mixed Methods Randomized Controlled Trial	10.1080/19345747.2022.2037799	Nigeria	Africa	Mixed Methods Randomized Control Trial	Community	6-17 years	850	873	1723	Children and Youth	Out of School children in coflict region of NorthEsat Nigeria	Accelerated Learning Program	9 months	Group-community intervention led by trained learning facilitators (LFs) in community-led NFLCs. Children come to the program 5 days per week, and spend 3 hours per day learning literacy, numeracy and SEL, with some free time to also play games.Parent and community support is mobilized for program implementation and monitoring activities (sense of security and safety). The govermrnt offer support …	Academic outcomes	Early Grade Reading Assessment (EGRA), the Early Grade Mathematics Assessment (EGMA), Children’s Stories, the Assessment of Children’s Emotion Skills (ACES), and the Moods and Feelings Questionnaire (MFQ).	Reading skills including letter identification, phonemic awareness (non-words), oral reading fluency, and listening and reading comprehension, math							Improved numeracy skills, the intervention did not show significant effect on SEL on quantitative terms. Qualitative findings showed improved social skills and awareness of the importance to behave responsibly.

## Sheet: Target Group
Students	69.1
Students/Teachers	7.3
Students/Parents	10.9
Curriculum	9.1
Family-Based	3.6
	100

## Sheet: Intervention Duration
Upto 8 Mnths	21
1-2 Yrs	45
3-5 Yrs	25
> 6 Yrs	9
	100

## Sheet: Intervention Setting
School	85.5
Home	3.6
School-Home	9.1
Community	1.8
	100

## Sheet: Sheet2
Pre-school	12.7
Kindergarten	18.2
Elementary School	54.5
Middle School	7.3
Junior Secondary	7.3
